# Supplementary material
Source: Springer Nature journal article supplement (https://www.springermedizin.de/resource/supplementary/12911_2013_752_MOESM5_ESM.pdf/9526600)
Supplement: MOESM5 [file 9526600]

**Table S4: Outcomes Assessed in VCM Trials**

| <b>Study</b>                            | <b>Likeability</b> | <b>Knowledge</b> | <b>Decision-making Processes</b> | <b>Decisional Conflict</b> | <b>Decision Satisfaction</b> | <b>Regret</b> | <b>Preference</b> | <b>Intent</b> | <b>Behavior</b> | <b>Health Outcome</b>        |
|-----------------------------------------|--------------------|------------------|----------------------------------|----------------------------|------------------------------|---------------|-------------------|---------------|-----------------|------------------------------|
| Abhyankar<br>2011 [1]<br>(n = 30)       |                    |                  | Improved                         | Improved                   |                              |               | No effect         |               |                 |                              |
| Clancy<br>1988 [2]<br>(n = 1280)        |                    |                  |                                  |                            |                              |               |                   |               | Increased       |                              |
| Feldman-Stewart<br>2006 [3]<br>(n = 90) | Improved           |                  |                                  |                            |                              |               |                   |               |                 |                              |
| Feldman-Stewart<br>2012 [4]             |                    |                  | Improved                         |                            |                              | Improved      |                   |               |                 |                              |
| Fraenkel<br>2007 [5]<br>(n = 87)        |                    |                  | Improved                         |                            |                              |               |                   |               |                 |                              |
| Frosch<br>2008 [6]<br>(n = 611)         |                    | No effect        |                                  | No effect                  |                              |               | No effect         |               |                 |                              |
| Kennedy<br>2002 [7]<br>(n = 894)        |                    |                  |                                  |                            | Improved                     |               |                   |               | Reduced         | No effect<br>(reduced costs) |

|                                        |           |           |                            |           |  |  |           |           |           |           |
|----------------------------------------|-----------|-----------|----------------------------|-----------|--|--|-----------|-----------|-----------|-----------|
| Lerman<br>1997 [8]<br>(n = 400)        |           | No effect | Improved                   |           |  |  |           | No effect | No effect |           |
| Montgomery<br>2003 [9]<br>(n = 217)    |           | Improved  |                            | Improved  |  |  | No effect | No effect | No effect | No effect |
| O'Connor<br>1999 [10]<br>(n = 201)     | No effect |           | No effect<br>(concordance) |           |  |  |           |           |           |           |
| Sheridan<br>2010 [11]<br>(n = 137)     | No effect |           | No effect                  | No effect |  |  |           | No effect |           |           |
| van Roosmalen<br>2004 [12]<br>(n = 88) |           |           | Improved                   |           |  |  | Changed   |           |           | Improved  |

*Note:* After this article was drafted, Fraenkel et al. (2012) reported results of a VCM with 104 arthritis patients based on FTT that increased the proportion of patients making an informed, value-concordant choice from 35% to 64%. [13]

## References

- [1] Abhyankar P, Bekker HL, Summers BA, Velikova G: **Why values elicitation techniques enable people to make informed decisions about cancer trial participation.** *Health Expect* 2011, **14 Suppl 1**:20-32.
- [2] Clancy CM, Cebul RD, Williams SV: **Guiding individual decisions: a randomized, controlled trial of decision analysis.** *Am J Med* 1988, **84**:283-288.
- [3] Feldman-Stewart D, Brennenstuhl S, Brundage MD, Roques T: **An explicit values clarification task: development and validation.** *Patient Educ Couns* 2006, **63**:350-356.
- [4] Feldman-Stewart D, Tong C, Siemens R, Alibhai S, Pickles T, Robinson J, Brundage MD: **The impact of explicit values clarification exercises in a patient decision aid emerges after the decision is actually made: evidence from a randomized controlled trial.** *Med Decis Making* 2012, **32**:616-626.
- [5] Fraenkel L, Rabidou N, Wittink D, Fried T: **Improving informed decision-making for patients with knee pain.** *J Rheumatol* 2007, **34**:1894-1898.
- [6] Frosch DL, Bhatnagar V, Tally S, Hamori CJ, Kaplan RM: **Internet patient decision support: a randomized controlled trial comparing alternative approaches for men considering prostate cancer screening.** *Arch Intern Med* 2008, **168**:363-369.
- [7] Kennedy AD, Sculpher MJ, Coulter A, Dwyer N, Rees M, Abrams KR, Horsley S, Cowley D, Kidson C, Kirwin C, Naish C, Stirrat G: **Effects of decision aids for menorrhagia on treatment choices, health outcomes, and costs: a randomized controlled trial.** *JAMA* 2002, **288**:2701-2708.
- [8] Lerman C, Biesecker B, Benkendorf JL, Kerner J, Gomez-Caminero A, Hughes C, Reed MM: **Controlled trial of pretest education approaches to enhance informed decision-making for BRCA1 gene testing.** *J Natl Cancer Inst* 1997, **89**:148-157.
- [9] Montgomery AA, Fahey T, Peters TJ: **A factorial randomised controlled trial of decision analysis and an information video plus leaflet for newly diagnosed hypertensive patients.** *Br J Gen Pract* 2003, **53**:446-453.

- [10] O'Connor AM, Wells GA, Tugwell P, Laupacis A, Elmslie T, Drake E: **The effects of an 'explicit' values clarification exercise in a woman's decision aid regarding postmenopausal hormone therapy.** *Health Expect* 1999, **2**:21-32.
- [11] Sheridan SL, Griffith JM, Behrend L, Gizlice Z, Cai JW, Pignone MP: **Effect of Adding a Values Clarification Exercise to a Decision Aid on Heart Disease Prevention: A Randomized Trial.** *Medical Decision Making* 2010, **30**:E28-E39.
- [12] van Roosmalen MS, Stalmeier PF, Verhoef LC, Hoekstra-Weebers JE, Oosterwijk JC, Hoogerbrugge N, Moog U, van Daal WA: **Randomised trial of a decision aid and its timing for women being tested for a BRCA1/2 mutation.** *Br J Cancer* 2004, **90**:333-342.
- [13] Fraenkel, L., Peters, E., Charpentier, P., Olsen, B., Errante, L., Schoen, R. T. and Reyna, V. (2012), Decision tool to improve the quality of care in rheumatoid arthritis. *Arthritis Care Res*, 64: 977–985.
